# Supplementary material for: The Construction of p/n-Cu2O Heterojunction Catalysts for Efficient CO2 Photoelectric Reduction
Source: MDPI journal article supplement (doi:10.3390/catal13050857), 2023-05-08
Supplement: s1 [file s1]

# Support Information

## The Construction of p/n-Cu<sub>2</sub>O Heterojunction Catalysts for Efficient CO<sub>2</sub> Photoelectric Reduction

Qianqian Zhou <sup>1,2,3</sup>, Yanxin Chen <sup>1,2,3,4,5,\*</sup>, Haoyan Shi <sup>2,3,5</sup>, Rui Chen <sup>2,3</sup>, Minghao Ji <sup>2,3</sup>, Kexian Li <sup>2,3</sup>, Hailong Wang <sup>2,3,5</sup>, Xia Jiang <sup>2,3</sup> and Canzhong Lu <sup>1,2,3,4,5,\*</sup>

<sup>1</sup> College of Chemical Engineering, Fuzhou University, Fuzhou 350108, China; xmzhouqianqian@fjirsm.ac.cn

<sup>2</sup> CAS Key Laboratory of Design and Assembly of Functional Nanostructures, and Fujian Provincial Key Laboratory of Nanomaterials, Fujian Institute of Research on the Structure of Matter, Chinese Academy of Sciences, Fuzhou 350002, China; xmshihaoan@fjirsm.ac.cn (H.S.); xmchenrui@fjirsm.ac.cn (R.C.); xmjiminghao@fjirsm.ac.cn (M.J.); xmlikexian@fjirsm.ac.cn (K.L.); xmwanghailong@fjirsm.ac.cn (H.W.); xmjiangxia@fjirsm.ac.cn (X.J.)

<sup>3</sup> Xiamen Key Laboratory of Rare Earth Photoelectric Functional Materials, Xiamen Institute of Rare-Earth Materials, Haixi Institutes, Chinese Academy of Sciences, Xiamen 361021, China

<sup>4</sup> Fujian Science & Technology Innovation Laboratory for Optoelectronic Information of China, Fuzhou 350108, China

<sup>5</sup> Fujian College, University of Chinese Academy of Sciences, Fuzhou 350108, China

\* Correspondence: yanxinchen@fjirsm.ac.cn (Y.C.); czlu@fjirsm.ac.cn (C.L.)

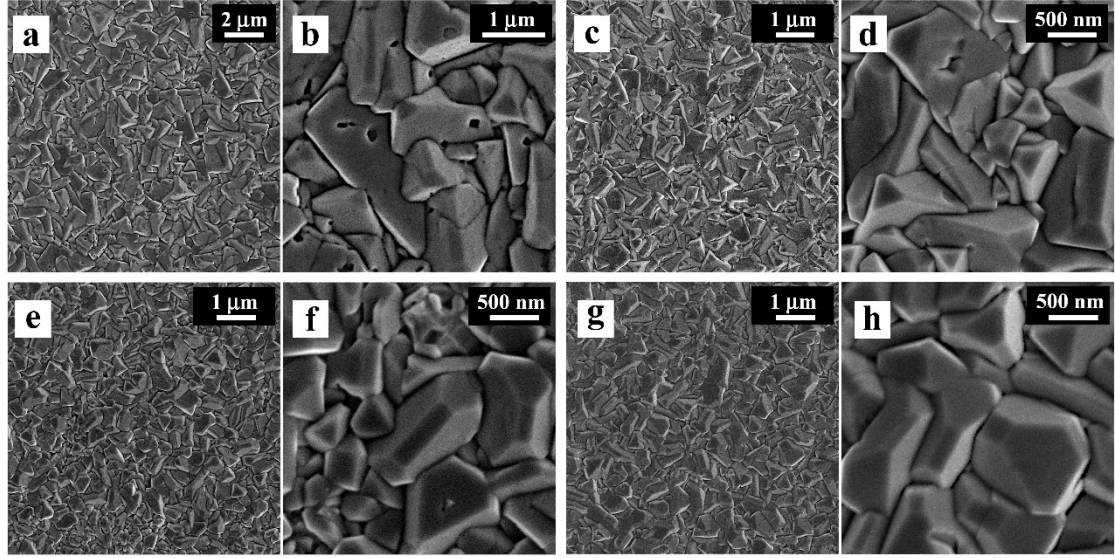

**Figure S1.** The top view SEM images of (a) p-0.5mAh/n-0.02mAh  $\text{Cu}_2\text{O}$ , (b) p-0.5mAh/n-0.03mAh  $\text{Cu}_2\text{O}$ , (c) p-0.5mAh/n-0.04mAh  $\text{Cu}_2\text{O}$ , (d) p-0.5mAh/n-0.05mAh  $\text{Cu}_2\text{O}$ .

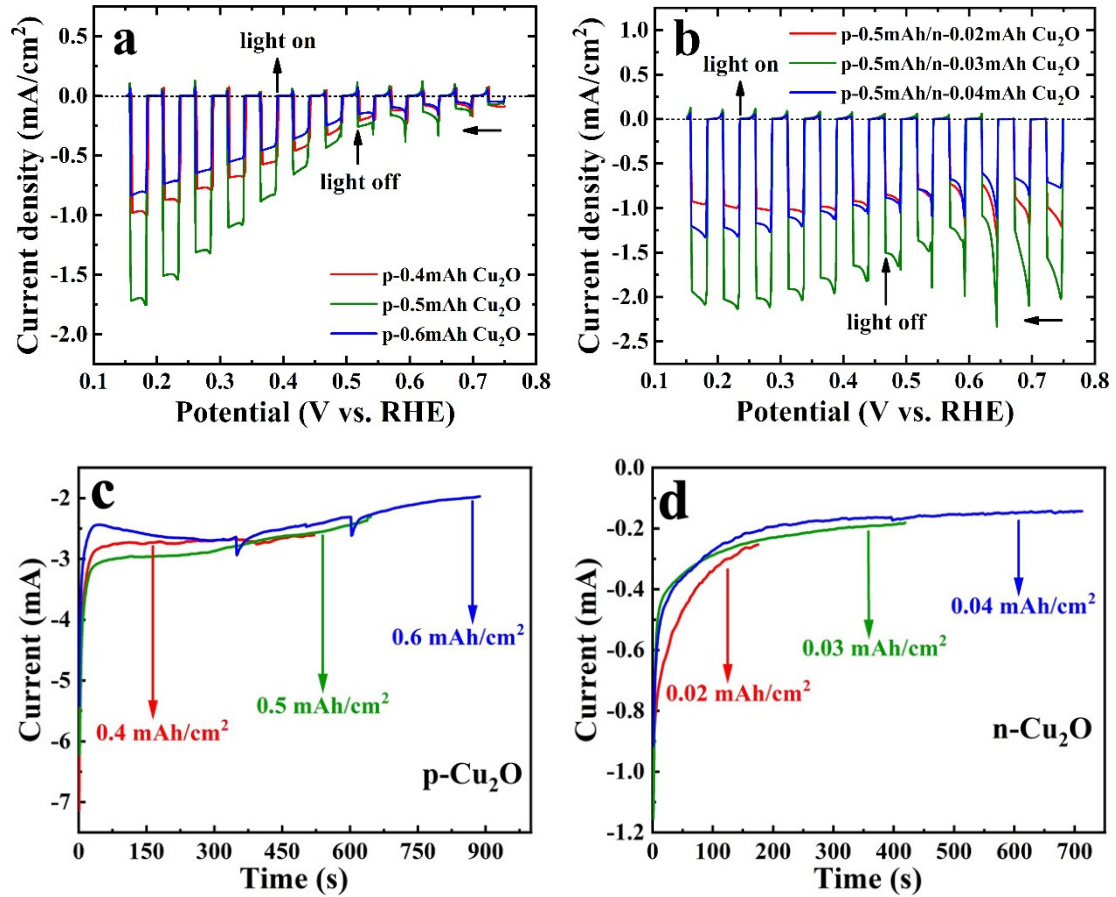

**Figure S2.** (a) LSV curves of p- $\text{Cu}_2\text{O}$  with different amounts of deposited charge, the electrolyte: (0.1 mol/L  $\text{NaHCO}_3$ ); (b) LSV curves of n- $\text{Cu}_2\text{O}$  with different quantities of deposited charge, the electrolyte: (0.1 mol/L  $\text{NaHCO}_3$ ); (c) Time-current curves of p- $\text{Cu}_2\text{O}$  with different amounts of deposited charge; (d) Time-current curves of n- $\text{Cu}_2\text{O}$  with varying quantities of deposited charge, substrate: p- $\text{Cu}_2\text{O}$  (0.5 mAh/cm<sup>2</sup>).

Since the 0.1 mol/L NaHCO<sub>3</sub> solution is easy to prepare and inexpensive, we used this solution to select our optimal sample for further investigation. The active size of the sample is 1 cm<sup>2</sup>. Comparing the photocurrent density of p-Cu<sub>2</sub>O samples when the deposited charge was 0.4 mAh/cm<sup>2</sup>, 0.5 mAh/cm<sup>2</sup> and 0.6 mAh/cm<sup>2</sup>, we found that when the deposited charge was 0.5 mAh/cm<sup>2</sup>, the photocurrent density of p-Cu<sub>2</sub>O samples was the most significant. The performance was optimal, and too much or too little deposition would affect its performance. Using the same method, p-Cu<sub>2</sub>O(0.5 mAh/cm<sup>2</sup>) was selected as the substrate, and we compared the photocurrent density of n-Cu<sub>2</sub>O when the deposition charge was 0.02 mAh/cm<sup>2</sup>, 0.03 mAh/cm<sup>2</sup> and 0.04 mAh/cm<sup>2</sup>. We found that when the deposition charge was 0.03 mAh/cm<sup>2</sup>, the photocurrent density of p/n-Cu<sub>2</sub>O samples was the largest, the performance was the best, and too much or too little deposition would affect its performance. Therefore, we believe that p/n-Cu<sub>2</sub>O has the best performance when the deposition charge of p-Cu<sub>2</sub>O is 0.5 mAh/cm<sup>2</sup> and the deposition charge of n-Cu<sub>2</sub>O is 0.03 mAh/cm<sup>2</sup>. Electrochemical reactions generate the photocurrent, and CO<sub>2</sub> reduction is a crucial electrochemical behavior for generating a photocurrent. Through qualitative analysis, we believe that the sample with the highest photocurrent density has the best CO<sub>2</sub> reduction performance. Therefore, we conducted a series of test studies on the selected samples in this study.

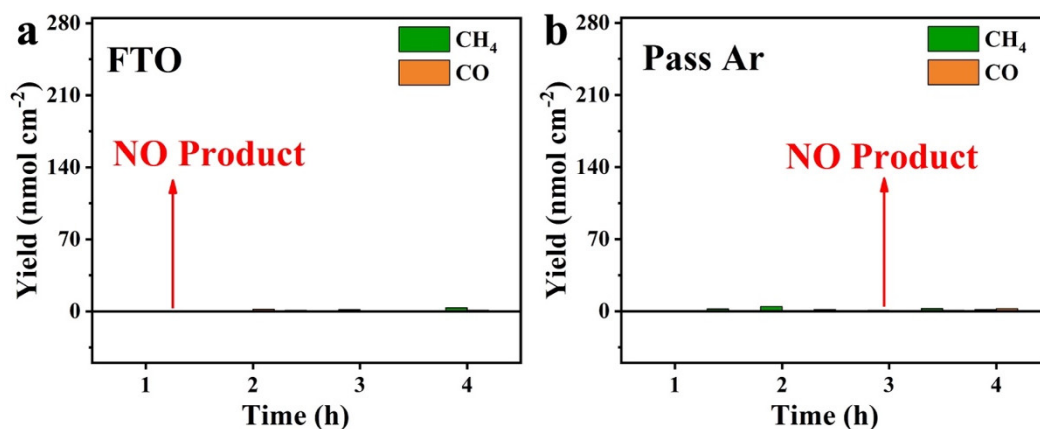

**Figure S3.** (a) CO<sub>2</sub> reduction yield (0.1 mol/L C<sub>6</sub>H<sub>15</sub>NO<sub>3</sub>/CH<sub>3</sub>CN + 0.1 mol/L C<sub>16</sub>H<sub>36</sub>F<sub>6</sub>NP/CH<sub>3</sub>CN, pH = 9.3, the sample is FTO); (b) CO<sub>2</sub> reduction yield (0.1 mol/L C<sub>6</sub>H<sub>15</sub>NO<sub>3</sub>/CH<sub>3</sub>CN + 0.1 mol/L C<sub>16</sub>H<sub>36</sub>F<sub>6</sub>NP/CH<sub>3</sub>CN, pH = 9.3, pass Ar).

We designed two experiments: (1) Take the FTO as the sample for testing, and the rest of the test conditions remain unchanged; (2) Replace the CO<sub>2</sub> gas introduced before the reaction with Ar gas, and the rest of the test conditions remain unchanged. The test

results showed that when replacing p/n-Cu<sub>2</sub>O with FTO, only trace impurity gases were present, and no product was produced. Similarly, when replacing CO<sub>2</sub> with Ar, only trace impurity gases are present, and no products are manufactured. Therefore, we believe that CO<sub>2</sub> reduction rather than other pollutants produces CO and CH<sub>4</sub>.

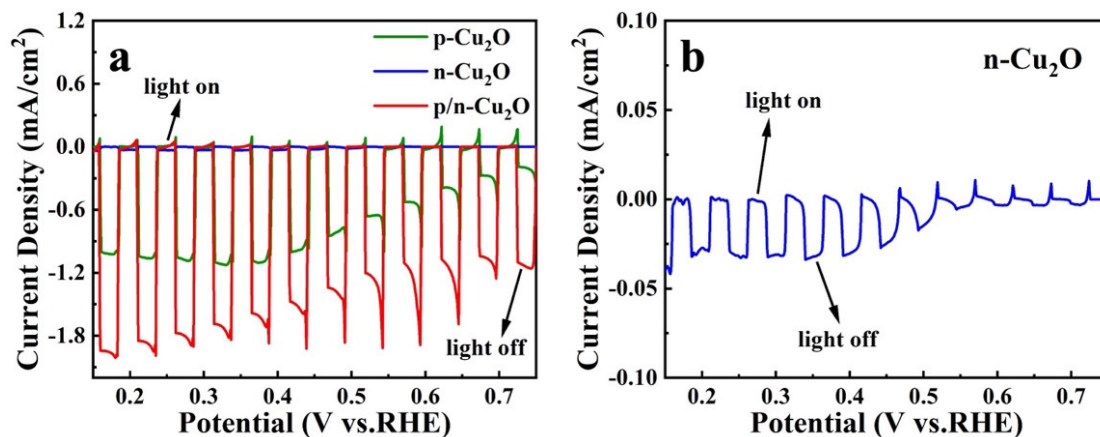

**Figure S4.** (a) LSV of p-Cu<sub>2</sub>O, n-Cu<sub>2</sub>O, p/n-Cu<sub>2</sub>O; (b) LSV of n-Cu<sub>2</sub>O. The electrolyte: (0.1 mol/L NaHCO<sub>3</sub>), the deposited charge: (p-Cu<sub>2</sub>O: 0.5 mAh/cm<sup>2</sup>, n-Cu<sub>2</sub>O: 0.03 mAh/cm<sup>2</sup>).

As can be seen from Figure S4, the photocurrent density of n-Cu<sub>2</sub>O is very low compared to p-Cu<sub>2</sub>O and p/n-Cu<sub>2</sub>O. The primary function of n-Cu<sub>2</sub>O is to promote the separation of photogenerated carriers by constructing a heterojunction with p-Cu<sub>2</sub>O, thereby improving the reduction efficiency of CO<sub>2</sub>.

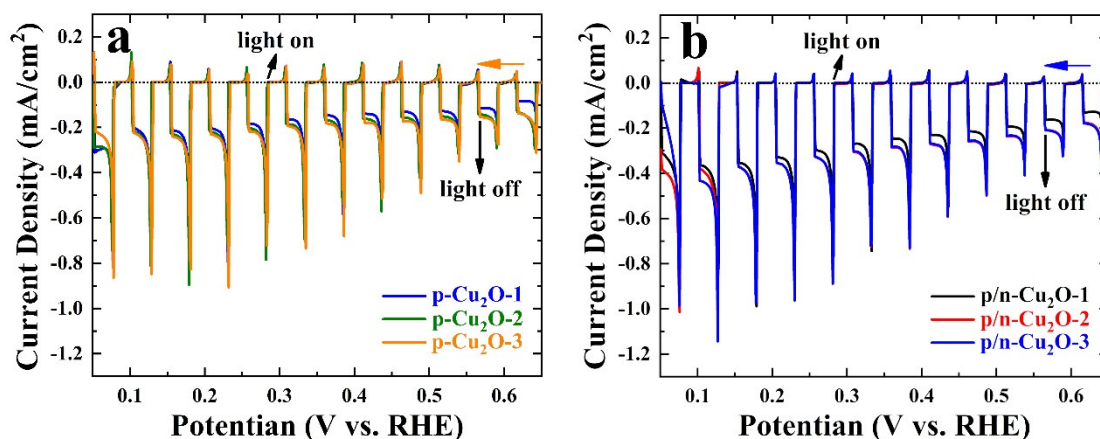

**Figure S5.** LSV curves of multiple samples of (a) p-Cu<sub>2</sub>O (p-0.5mAh Cu<sub>2</sub>O). LSV curves of multiple samples of (b) p/n-Cu<sub>2</sub>O (p-0.5mAh/n-0.03mAh Cu<sub>2</sub>O).

**Figure S5** (a) (b) shows the LSV tests of the multiple samples of p-Cu<sub>2</sub>O (p-0.5mAh Cu<sub>2</sub>O) and p/n-Cu<sub>2</sub>O (p-0.5mAh/n-0.03mAh Cu<sub>2</sub>O), respectively. The performance of p-Cu<sub>2</sub>O and p/n-Cu<sub>2</sub>O samples is stable and repeatable.
